# Supplementary material for: Development of an electrochemical surface-enhanced Raman spectroscopy (EC-SERS) fabric-based plasmonic sensor for point-of-care diagnostics
Source: Royal Society of Chemistry journal article supplement (doi:10.1039/c8an01117f), 2018-01-01
Supplement: c8an01117f1.pdf [file c8an01117f1.pdf]

## Development of an Electrochemical Surface-Enhanced Raman Spectroscopy (EC-SERS) Fabric-Based Plasmonic Sensor for Point-of-Care Diagnostics

Shruti D. Bindesri<sup>a</sup>, Dalal S. Alhatab<sup>a</sup>, Christa L. Brosseau<sup>a\*</sup>

### Supporting Information

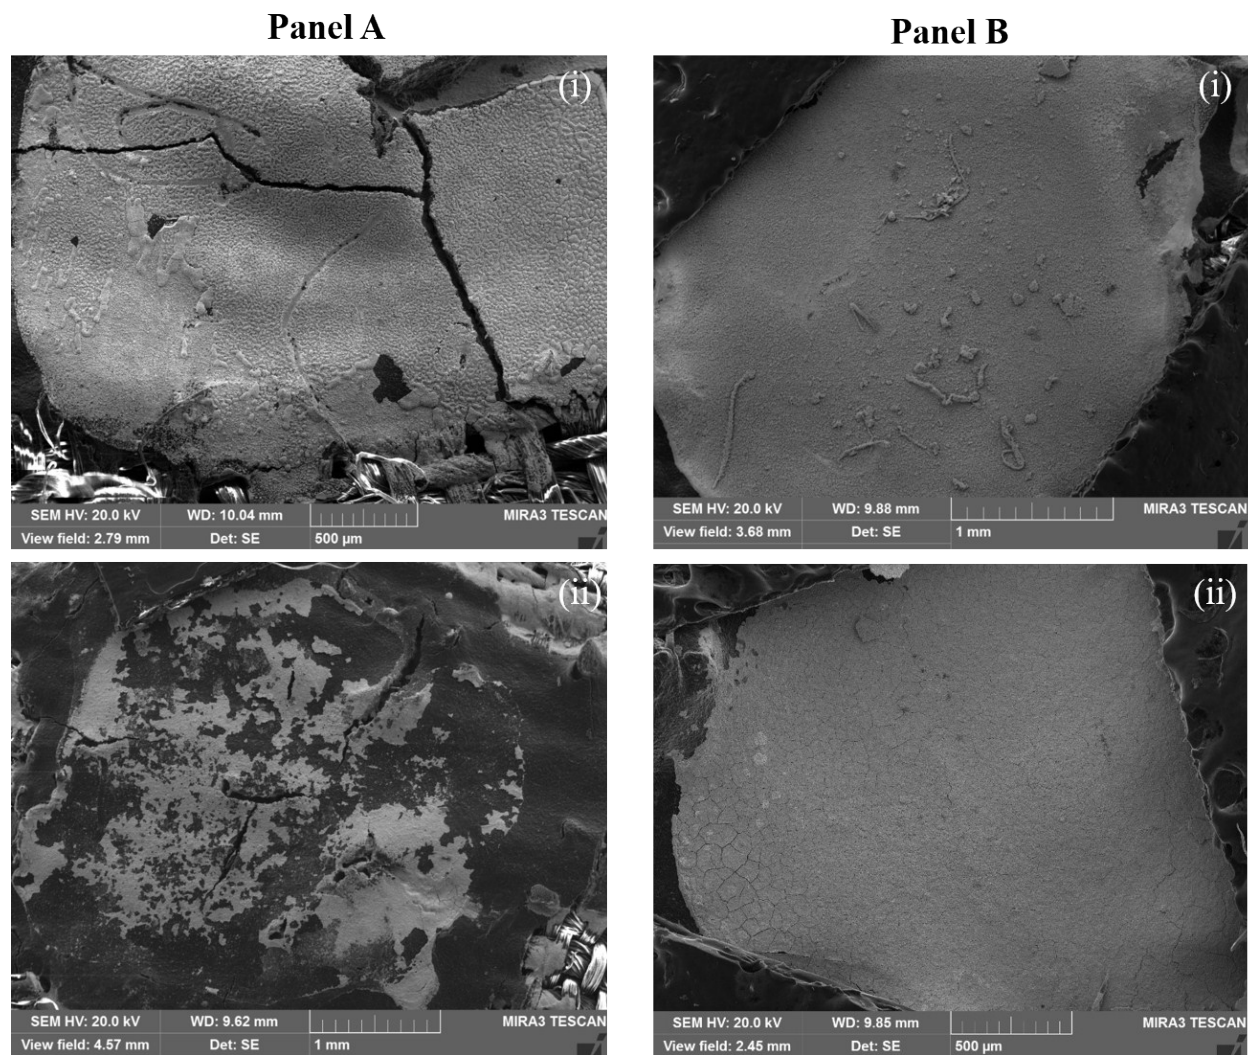

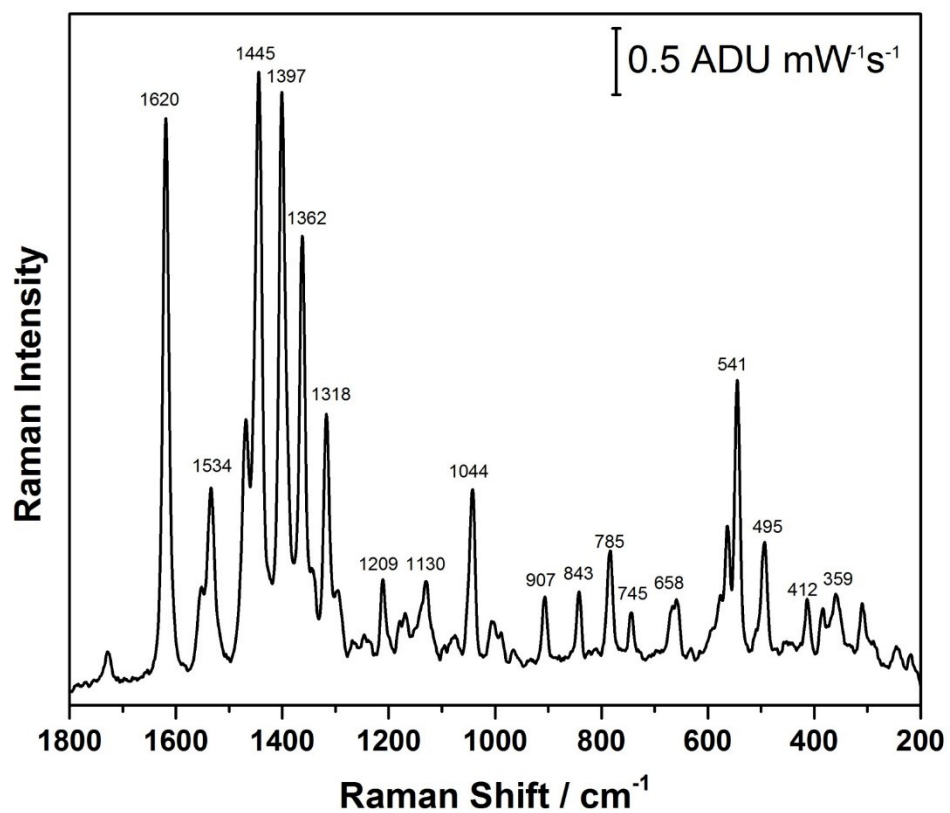

**Figure S-2.** Normal Raman spectrum of levofloxacin powder. The spectrum was collected at 22.3 mW for a time interval of 30 seconds using 785 nm excitation.

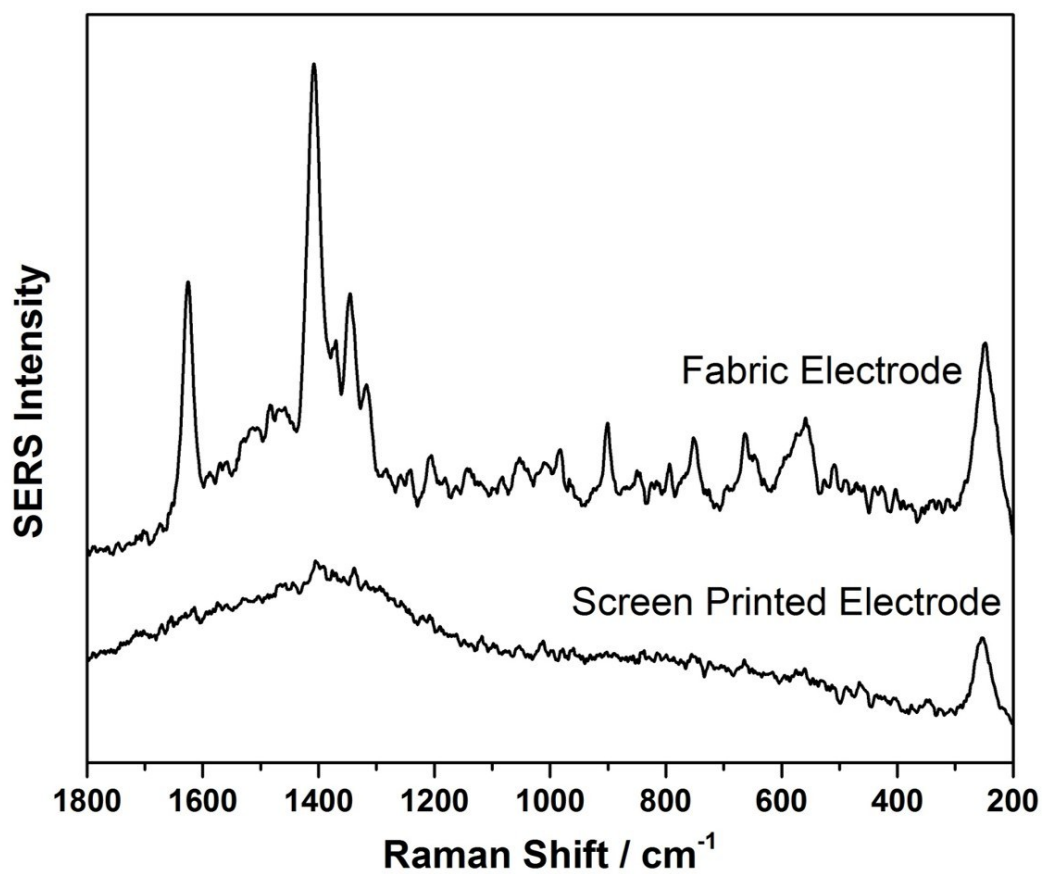

**Figure S-3.** Comparison of the SERS signal recorded at open circuit potential for 1.0 mM levofloxacin in synthetic urine for the mercerized fabric electrode and the screen printed electrode. Each spectrum was acquired at 785 nm excitation for 30 seconds at a laser power of 46.5 mW.
